# Supplementary material
Source: publisher figshare collection journal article supplement (https://gsapubs.figshare.com/ndownloader/files/22756556)
Supplement: Supplementary file 1 [file 22756556]

GSA Data Repository item 2007170

Geology and thermochronology of Tertiary Cordilleran-style metamorphic core complexes in the Saghand region of central Iran, by C. Verdel et al.; *GSA Bulletin*; v. 117, doi: 10.1130/B26102.1

**TABLE S1. U-Pb DATA**

| Sample                                    | Pb <sub>c</sub> <sup>‡</sup> | Pb <sup>*‡</sup> | Th   | <sup>206</sup> Pb <sup>§</sup> | <sup>208</sup> Pb <sup>#</sup> | Ratios                          |       |                                 |       |                                 |       | Age (Ma)          |                   |                   | corr. coef. |
|-------------------------------------------|------------------------------|------------------|------|--------------------------------|--------------------------------|---------------------------------|-------|---------------------------------|-------|---------------------------------|-------|-------------------|-------------------|-------------------|-------------|
|                                           |                              |                  |      |                                |                                | <sup>206</sup> Pb <sup>††</sup> | error | <sup>207</sup> Pb <sup>††</sup> | error | <sup>207</sup> Pb <sup>††</sup> | error | <sup>206</sup> Pb | <sup>207</sup> Pb | <sup>207</sup> Pb |             |
| Fract'ns <sup>†</sup>                     | (pg)                         | Pb <sub>c</sub>  | U    | <sup>204</sup> Pb              | <sup>206</sup> Pb              | <sup>238</sup> U                | (2σ%) | <sup>235</sup> U                | (2σ%) | <sup>206</sup> Pb               | (2σ%) | <sup>238</sup> U  | <sup>235</sup> U  | <sup>206</sup> Pb |             |
| Mylonitic gneiss – Neybaz Mountain (2604) |                              |                  |      |                                |                                |                                 |       |                                 |       |                                 |       |                   |                   |                   |             |
| 32° 29.952' N, 55° 6.343' E               |                              |                  |      |                                |                                |                                 |       |                                 |       |                                 |       |                   |                   |                   |             |
| z2                                        | 0.7                          | 48               | 0.52 | 2944.4                         | 0.166                          | 0.007686                        | (.09) | 0.04984                         | (.17) | 0.04704                         | (.15) | 49.35             | 49.39             | 51.1              | 0.521       |
| z4                                        | 0.3                          | 63               | 0.52 | 3848.4                         | 0.166                          | 0.007661                        | (.06) | 0.04972                         | (.14) | 0.04707                         | (.12) | 49.20             | 49.27             | 53.0              | 0.494       |
| z1                                        | 0.6                          | 34               | 0.40 | 2137.8                         | 0.128                          | 0.007650                        | (.11) | 0.04963                         | (.29) | 0.04706                         | (.26) | 49.12             | 49.19             | 52.3              | 0.451       |
| z3                                        | 0.7                          | 96               | 0.37 | 6080.9                         | 0.120                          | 0.007630                        | (.06) | 0.04954                         | (.13) | 0.04709                         | (.12) | 49.00             | 49.10             | 53.8              | 0.477       |
| z5                                        | 0.7                          | 41               | 0.53 | 2509.4                         | 0.170                          | 0.007625                        | (.09) | 0.04950                         | (.17) | 0.04708                         | (.14) | 48.97             | 49.06             | 53.3              | 0.551       |
| z6                                        | 0.3                          | 107              | 0.52 | 6489.2                         | 0.166                          | 0.007634                        | (.05) | 0.04957                         | (.10) | 0.04709                         | (.09) | 49.02             | 49.12             | 53.9              | 0.517       |

<sup>†</sup> All analyses are annealed and chemically treated single zircon grains.

<sup>‡</sup> Pb<sub>c</sub> is total common Pb in analysis. Pb\* is radiogenic Pb concentration.

<sup>§</sup> Measured ratio corrected for spike and fractionation only.

<sup>#</sup> Radiogenic Pb ratio.

<sup>††</sup> Corrected for fractionation, spike, blank, and initial common Pb. Mass fractionation correction of 0.25%/amu ± 0.04%/amu (atomic mass unit) was applied to single-collector Daly analyses. Total procedural blank was less than 0.7 pg for Pb and less than 0.1 pg for U. Blank isotopic composition: <sup>206</sup>Pb/<sup>204</sup>Pb = 18.27 ± 0.1, <sup>207</sup>Pb/<sup>204</sup>Pb = 15.59 ± 0.1, <sup>208</sup>Pb/<sup>204</sup>Pb = 38.12 ± 0.1.

Corr. coef. = correlation coefficient.

Age calculations are based on the decay constants of Steiger and Jäger (1977).

**TABLE S2.**  $^{40}\text{Ar}/^{39}\text{Ar}$  data for western domain samples

| Sample<br>Run ID                   | Power<br>(W) | $^{40}\text{Ar}$<br>(nA) | $\sigma$<br>(nA) | $^{39}\text{Ar}$<br>(nA) | $\sigma$<br>(nA) | $^{38}\text{Ar}$<br>(nA) | $\sigma$<br>(nA) | $^{37}\text{Ar}$<br>(nA) | $\sigma$<br>(nA) | $^{36}\text{Ar}$<br>(nA) | $\sigma$<br>(nA) | $^{40}\text{Ar}^*/^{39}\text{Ar}_K$ | $\sigma$ | % $^{40}\text{Ar}^*$ | Age<br>(Ma) | $\sigma$<br>Ma |
|------------------------------------|--------------|--------------------------|------------------|--------------------------|------------------|--------------------------|------------------|--------------------------|------------------|--------------------------|------------------|-------------------------------------|----------|----------------------|-------------|----------------|
| <b>Sample 1604, biotite</b>        |              |                          |                  |                          |                  |                          |                  |                          |                  |                          |                  |                                     |          |                      |             |                |
| <i>32° 25.849' N, 55° 9.516' E</i> |              |                          |                  |                          |                  |                          |                  |                          |                  |                          |                  |                                     |          |                      |             |                |
| 34183-01                           | 5            | 1.00664                  | 0.00102          | 0.08679                  | 0.00022          | 0.00128                  | 0.00002          | 0.00440                  | 0.00005          | 0.00081                  | 0.00001          | 8.8459                              | 0.0603   | 76.27                | 41.56       | 0.28           |
| 34183-02                           | 5            | 1.48920                  | 0.00096          | 0.14991                  | 0.00038          | 0.00207                  | 0.00003          | 0.00152                  | 0.00005          | 0.00048                  | 0.00001          | 8.9835                              | 0.0412   | 90.44                | 42.20       | 0.19           |
| 34183-03                           | 5            | 12.12987                 | 0.00531          | 0.08692                  | 0.00022          | 0.00849                  | 0.00004          | 0.00149                  | 0.00004          | 0.03813                  | 0.00005          | 9.9132                              | 1.0836   | 7.10                 | 46.51       | 5.02           |
| 34183-04                           | 5            | 0.92257                  | 0.00133          | 0.05141                  | 0.00017          | 0.00098                  | 0.00002          | 0.00253                  | 0.00005          | 0.00162                  | 0.00001          | 8.6378                              | 0.1218   | 48.13                | 40.59       | 0.57           |
| 34183-05                           | 5            | 0.36978                  | 0.00053          | 0.03632                  | 0.00013          | 0.00054                  | 0.00002          | 0.00149                  | 0.00005          | 0.00018                  | 0.00001          | 8.7524                              | 0.0827   | 85.96                | 41.13       | 0.38           |
| 34183-06                           | 5            | 1.31457                  | 0.00143          | 0.12734                  | 0.00026          | 0.00179                  | 0.00002          | 0.00437                  | 0.00007          | 0.00065                  | 0.00002          | 8.8185                              | 0.0552   | 85.42                | 41.43       | 0.26           |
| 34183-07                           | 5            | 0.68070                  | 0.00090          | 0.07099                  | 0.00022          | 0.00099                  | 0.00002          | 0.00106                  | 0.00004          | 0.00025                  | 0.00001          | 8.5315                              | 0.0520   | 88.98                | 40.10       | 0.24           |
| 34183-08                           | 5            | 0.68510                  | 0.00100          | 0.05976                  | 0.00015          | 0.00101                  | 0.00002          | 0.00124                  | 0.00004          | 0.00061                  | 0.00002          | 8.4544                              | 0.0928   | 73.75                | 39.74       | 0.43           |
| 34183-09                           | 5            | 0.65149                  | 0.00113          | 0.05718                  | 0.00021          | 0.00086                  | 0.00002          | 0.00295                  | 0.00005          | 0.00055                  | 0.00001          | 8.5656                              | 0.0739   | 75.19                | 40.26       | 0.34           |
| 34183-10                           | 5            | 0.77398                  | 0.00104          | 0.06435                  | 0.00012          | 0.00103                  | 0.00002          | 0.00221                  | 0.00005          | 0.00075                  | 0.00002          | 8.6000                              | 0.0989   | 71.51                | 40.42       | 0.46           |
| <b>Sample 1304, plagioclase</b>    |              |                          |                  |                          |                  |                          |                  |                          |                  |                          |                  |                                     |          |                      |             |                |
| <i>32° 26.779' N, 55° 9.707' E</i> |              |                          |                  |                          |                  |                          |                  |                          |                  |                          |                  |                                     |          |                      |             |                |
| 34187-01B                          | 0.6          | 0.30214                  | 0.00132          | 0.01339                  | 0.00013          | 0.00031                  | 0.00004          | 0.06957                  | 0.00039          | 0.00063                  | 0.00003          | 9.0081                              | 0.7937   | 39.77                | 42.31       | 3.68           |
| 34187-01C                          | 0.9          | 0.44673                  | 0.00129          | 0.02925                  | 0.00013          | 0.00049                  | 0.00004          | 0.21280                  | 0.00073          | 0.00068                  | 0.00003          | 8.9763                              | 0.3534   | 58.49                | 42.17       | 1.64           |
| 34187-01D                          | 1.2          | 0.66043                  | 0.00202          | 0.04975                  | 0.00018          | 0.00077                  | 0.00004          | 0.39962                  | 0.00139          | 0.00081                  | 0.00003          | 9.1415                              | 0.2127   | 68.48                | 42.93       | 0.99           |
| 34187-01E                          | 1.7          | 0.65136                  | 0.00164          | 0.04940                  | 0.00018          | 0.00076                  | 0.00004          | 0.45224                  | 0.00159          | 0.00084                  | 0.00003          | 8.9209                              | 0.2129   | 67.23                | 41.91       | 0.99           |
| 34187-01F                          | 2.2          | 0.09436                  | 0.00079          | 0.00757                  | 0.00010          | 0.00015                  | 0.00004          | 0.09685                  | 0.00074          | 0.00013                  | 0.00003          | 8.5925                              | 1.3303   | 68.29                | 40.38       | 6.18           |
| 34187-01G                          | 2.7          | 0.05402                  | 0.00083          | 0.00421                  | 0.00008          | 0.00008                  | 0.00003          | 0.05682                  | 0.00052          | 0.00005                  | 0.00003          | 10.2622                             | 2.2736   | 79.33                | 48.13       | 10.52          |
| 34187-01H                          | 3.2          | 0.06241                  | 0.00079          | 0.00504                  | 0.00009          | 0.00008                  | 0.00003          | 0.06581                  | 0.00053          | 0.00007                  | 0.00003          | 9.5098                              | 1.9512   | 76.14                | 44.64       | 9.05           |

**TABLE S2, continued.**  $^{40}\text{Ar}/^{39}\text{Ar}$  data for western domain samples

| Sample<br>Run ID                    | Power<br>(W) | $^{40}\text{Ar}$<br>(nA) | $\sigma$<br>(nA) | $^{39}\text{Ar}$<br>(nA) | $\sigma$<br>(nA) | $^{38}\text{Ar}$<br>(nA) | $\sigma$<br>(nA) | $^{37}\text{Ar}$<br>(nA) | $\sigma$<br>(nA) | $^{36}\text{Ar}$<br>(nA) | $\sigma$<br>(nA) | $^{40}\text{Ar}^*/^{39}\text{Ar}_K$ | $\sigma$ | % $^{40}\text{Ar}^*$ | Age<br>(Ma) | $\sigma$<br>Ma |
|-------------------------------------|--------------|--------------------------|------------------|--------------------------|------------------|--------------------------|------------------|--------------------------|------------------|--------------------------|------------------|-------------------------------------|----------|----------------------|-------------|----------------|
| <b>Sample 1304, plagioclase</b>     |              |                          |                  |                          |                  |                          |                  |                          |                  |                          |                  |                                     |          |                      |             |                |
| <i>32° 26.779' N, 55° 9.707' E</i>  |              |                          |                  |                          |                  |                          |                  |                          |                  |                          |                  |                                     |          |                      |             |                |
| 34187-02B                           | 0.4          | 0.17395                  | 0.00076          | 0.00364                  | 0.00007          | 0.00012                  | 0.00003          | 0.00995                  | 0.00020          | 0.00050                  | 0.00003          | 7.5722                              | 2.5565   | 15.81                | 35.64       | 11.91          |
| 34187-02C                           | 0.6          | 0.29381                  | 0.00094          | 0.00998                  | 0.00009          | 0.00023                  | 0.00003          | 0.04958                  | 0.00032          | 0.00071                  | 0.00003          | 8.8459                              | 0.9521   | 29.94                | 41.56       | 4.42           |
| 34187-02D                           | 0.9          | 0.36705                  | 0.00110          | 0.02455                  | 0.00012          | 0.00035                  | 0.00003          | 0.17074                  | 0.00075          | 0.00054                  | 0.00003          | 8.9863                              | 0.3875   | 59.83                | 42.21       | 1.80           |
| 34187-02E                           | 1.2          | 0.70299                  | 0.00192          | 0.04745                  | 0.00020          | 0.00087                  | 0.00004          | 0.34992                  | 0.00110          | 0.00105                  | 0.00003          | 8.9026                              | 0.2173   | 59.78                | 41.82       | 1.01           |
| 34187-02F                           | 1.5          | 0.90571                  | 0.00211          | 0.06439                  | 0.00024          | 0.00111                  | 0.00004          | 0.52063                  | 0.00140          | 0.00131                  | 0.00003          | 8.7347                              | 0.1671   | 61.75                | 41.04       | 0.78           |
| 34187-02G                           | 1.8          | 0.73461                  | 0.00173          | 0.04732                  | 0.00020          | 0.00090                  | 0.00004          | 0.42391                  | 0.00111          | 0.00117                  | 0.00003          | 8.9623                              | 0.2202   | 57.38                | 42.10       | 1.02           |
| 34187-02H                           | 2.2          | 0.43084                  | 0.00116          | 0.02987                  | 0.00017          | 0.00052                  | 0.00004          | 0.32917                  | 0.00083          | 0.00063                  | 0.00003          | 9.1683                              | 0.3291   | 63.08                | 43.06       | 1.53           |
| 34187-02I                           | 3.5          | 0.15289                  | 0.00081          | 0.01039                  | 0.00009          | 0.00016                  | 0.00003          | 0.13484                  | 0.00087          | 0.00024                  | 0.00003          | 9.0646                              | 0.9086   | 61.03                | 42.58       | 4.22           |
| 34187-02J                           | 7            | 0.29046                  | 0.00093          | 0.00707                  | 0.00009          | 0.00024                  | 0.00003          | 0.08577                  | 0.00046          | 0.00078                  | 0.00003          | 9.5838                              | 1.3943   | 23.13                | 44.98       | 6.46           |
| <b>Sample 1404, alkali feldspar</b> |              |                          |                  |                          |                  |                          |                  |                          |                  |                          |                  |                                     |          |                      |             |                |
| <i>32° 26.599' N, 55° 9.830' E</i>  |              |                          |                  |                          |                  |                          |                  |                          |                  |                          |                  |                                     |          |                      |             |                |
| 34190-02                            | 4            | 0.35877                  | 0.00059          | 0.00388                  | 0.00003          | 0.00029                  | 0.00001          | 0.00308                  | 0.00009          | 0.00111                  | 0.00001          | 8.2742                              | 1.0551   | 8.93                 | 38.90       | 4.91           |
| 34190-03                            | 4            | 0.12340                  | 0.00044          | 0.00774                  | 0.00007          | 0.00015                  | 0.00001          | 0.03317                  | 0.00024          | 0.00021                  | 0.00001          | 8.1706                              | 0.2620   | 51.08                | 38.42       | 1.22           |
| 34190-04                            | 4            | 0.04751                  | 0.00036          | 0.00284                  | 0.00004          | 0.00006                  | 0.00001          | 0.05492                  | 0.00023          | 0.00008                  | 0.00001          | 9.7939                              | 0.6852   | 57.79                | 45.96       | 3.17           |
| 34190-05                            | 4            | 0.60345                  | 0.00067          | 0.00530                  | 0.00004          | 0.00045                  | 0.00001          | 0.00341                  | 0.00008          | 0.00191                  | 0.00001          | 7.4245                              | 1.0795   | 6.52                 | 34.95       | 5.03           |
| 34190-06                            | 4            | 0.48638                  | 0.00093          | 0.01001                  | 0.00008          | 0.00041                  | 0.00001          | 0.01475                  | 0.00012          | 0.00135                  | 0.00001          | 8.8744                              | 0.4743   | 18.25                | 41.69       | 2.20           |
| 34190-07                            | 4            | 0.33082                  | 0.00076          | 0.00773                  | 0.00007          | 0.00026                  | 0.00001          | 0.09542                  | 0.00034          | 0.00093                  | 0.00001          | 8.2171                              | 0.4738   | 19.02                | 38.64       | 2.20           |
| 34190-10                            | 4            | 0.42792                  | 0.00059          | 0.00744                  | 0.00007          | 0.00040                  | 0.00001          | 0.00309                  | 0.00009          | 0.00123                  | 0.00001          | 8.7855                              | 0.6084   | 15.27                | 41.28       | 2.83           |
| 34190-11                            | 4            | 0.05779                  | 0.00033          | 0.00461                  | 0.00005          | 0.00009                  | 0.00001          | 0.07763                  | 0.00030          | 0.00008                  | 0.00001          | 8.9412                              | 0.4044   | 70.52                | 42.00       | 1.88           |

**TABLE S3.**  $^{40}\text{Ar}/^{39}\text{Ar}$  data for eastern domain samples

| Sample 1704, biotite, 1.50 mg, J = 0.00151862 ± 0.0952% |       |          |        |        |       |        |         |        |                 |            |                 |          |        |
|---------------------------------------------------------|-------|----------|--------|--------|-------|--------|---------|--------|-----------------|------------|-----------------|----------|--------|
| 32° 30.712' N, 55° 33.490 E                             |       |          |        |        |       |        |         |        |                 |            |                 |          |        |
| Step                                                    | T (C) | t (min.) | 36Ar   | 37Ar   | 38Ar  | 39Ar   | 40Ar    | %40Ar* | % 39Ar released | Ca/K       | 40Ar*/39ArK     | Age (Ma) | 1 s.d. |
| 1                                                       | 650   | 12       | 1.185  | 0.489  | 0.234 | 0.123  | 355.438 | 5.2    | 0.1             | 14.559186  | 159.044460      | 390.30   | 63.44  |
| 2                                                       | 725   | 12       | 1.174  | 0.142  | 0.236 | 0.933  | 377.176 | 12.3   | 0.6             | 0.55502762 | 47.501559       | 125.66   | 5.75   |
| 3                                                       | 790   | 12       | 6.450  | 0.583  | 1.280 | 6.770  | 2330.42 | 21.5   | 4.4             | 0.31401927 | 74.009831       | 192.16   | 2.14   |
| 4                                                       | 850   | 12       | 5.760  | 0.484  | 1.429 | 25.468 | 3750.04 | 56.6   | 16.7            | 0.06929389 | 83.637632       | 215.72   | 1.02   |
| 5                                                       | 905   | 12       | 0.666  | 0.286  | 0.367 | 18.285 | 1695.17 | 90.0   | 12.0            | 0.05703138 | 76.650557       | 198.65   | 0.67   |
| 6                                                       | 960   | 12       | 0.676  | 0.363  | 0.364 | 19.795 | 1802.18 | 90.6   | 12.9            | 0.06686444 | 82.111305       | 212.00   | 0.71   |
| 7                                                       | 1015  | 12       | 0.692  | 0.592  | 0.458 | 25.864 | 2329.33 | 92.6   | 16.9            | 0.08345883 | 83.238422       | 214.75   | 0.67   |
| 8                                                       | 1055  | 12       | 0.566  | 7.725  | 0.548 | 32.568 | 3071.00 | 95.6   | 21.3            | 0.86507904 | 90.257038       | 231.74   | 0.75   |
| 9                                                       | 1095  | 12       | 0.435  | 11.578 | 0.260 | 13.478 | 1237.73 | 92.0   | 8.8             | 3.13511068 | 83.669016       | 215.79   | 0.69   |
| 10                                                      | 1135  | 12       | 0.228  | 2.297  | 0.092 | 4.805  | 421.639 | 89.9   | 3.1             | 1.74393691 | 73.373017       | 190.59   | 0.65   |
| 11                                                      | 1180  | 12       | 0.289  | 2.719  | 0.109 | 2.372  | 254.683 | 74.1   | 1.6             | 4.18481533 | 70.228433       | 182.82   | 0.71   |
| 12                                                      | 1250  | 12       | 0.272  | 3.454  | 0.089 | 0.979  | 151.366 | 55.9   | 0.6             | 12.9139448 | 68.771262       | 179.21   | 1.50   |
| 13                                                      | 1400  | 12       | 0.527  | 8.581  | 0.116 | 1.436  | 621.574 | 78.8   | 0.9             | 21.9318247 | 327.440483      | 728.19   | 3.44   |
| Cumulative %39Ar released =                             |       |          |        |        |       |        |         |        | 100.0           |            | Total gas age = | 218.27   | 0.51   |
| Sample 1804, biotite, 0.80 mg, J = 0.00149439 ± 0.1458% |       |          |        |        |       |        |         |        |                 |            |                 |          |        |
| 32 30.554' N, 55 31.001' E                              |       |          |        |        |       |        |         |        |                 |            |                 |          |        |
| Step                                                    | T (C) | t (min.) | 36Ar   | 37Ar   | 38Ar  | 39Ar   | 40Ar    | %40Ar* | % 39Ar released | Ca/K       | 40Ar*/39ArK     | Age (Ma) | 1 s.d. |
| 1                                                       | 650   | 12       | 1.796  | 0.074  | 0.343 | 0.046  | 522.880 | 2.2    | 0.1             | 5.95967947 | 318.279303      | 701.94   | 130.97 |
| 2                                                       | 725   | 12       | 0.813  | 0.270  | 0.187 | 0.235  | 253.190 | 9.7    | 0.6             | 4.25424452 | 99.455224       | 249.98   | 15.85  |
| 3                                                       | 790   | 12       | 2.886  | 1.506  | 0.553 | 1.425  | 929.788 | 12.1   | 3.9             | 3.91284014 | 78.089842       | 199.13   | 6.23   |
| 4                                                       | 840   | 12       | 11.986 | 2.349  | 2.338 | 4.194  | 3852.95 | 11.6   | 11.5            | 2.07250874 | 107.299564      | 268.30   | 5.57   |
| 5                                                       | 890   | 12       | 0.657  | 0.462  | 0.175 | 3.853  | 630.711 | 73.4   | 10.5            | 0.44347792 | 116.639294      | 289.87   | 1.33   |
| 6                                                       | 940   | 12       | 0.473  | 1.198  | 0.178 | 7.582  | 1024.44 | 89.1   | 20.7            | 0.58441382 | 118.678318      | 294.55   | 1.10   |
| 7                                                       | 990   | 12       | 0.382  | 4.314  | 0.165 | 8.278  | 1093.15 | 92.3   | 22.6            | 1.92831363 | 120.332481      | 298.33   | 1.03   |
| 8                                                       | 1040  | 12       | 0.362  | 8.471  | 0.126 | 5.903  | 857.919 | 90.8   | 16.1            | 5.31528882 | 129.773723      | 319.78   | 1.13   |
| 9                                                       | 1100  | 12       | 0.284  | 6.263  | 0.080 | 3.317  | 501.455 | 88.6   | 9.1             | 6.9971508  | 129.026930      | 318.09   | 2.15   |
| 10                                                      | 1180  | 12       | 0.157  | 3.610  | 0.034 | 0.727  | 144.996 | 83.2   | 2.0             | 18.4650128 | 131.332632      | 323.29   | 5.00   |
| 11                                                      | 1400  | 12       | 0.593  | 9.159  | 0.134 | 1.005  | 314.117 | 44.8   | 2.7             | 34.046981  | 122.095747      | 302.36   | 3.17   |
| Cumulative %39Ar released =                             |       |          |        |        |       |        |         |        | 100.0           |            | Total gas age = | 295.36   | 1.08   |

**TABLE S3, continued.**  $^{40}\text{Ar}/^{39}\text{Ar}$  data for eastern domain samples

**Sample 1904, biotite, 1.40 mg, J = 0.00151068 ± 0.0997%**

32° 31.949' N, 55° 28.705' E

| Step                                           | T (C) | t (min.) | $^{36}\text{Ar}$ | $^{37}\text{Ar}$ | $^{38}\text{Ar}$ | $^{39}\text{Ar}$ | $^{40}\text{Ar}$ | % $^{40}\text{Ar}^*$ | % $^{39}\text{Ar}$<br>released | Ca/K       | $^{40}\text{Ar}^*/^{39}\text{ArK}$ | Age<br>(Ma) | 1 s.d. |
|------------------------------------------------|-------|----------|------------------|------------------|------------------|------------------|------------------|----------------------|--------------------------------|------------|------------------------------------|-------------|--------|
| 1                                              | 670   | 12       | 2.619            | 0.074            | 0.505            | 0.085            | 760.456          | 2.0                  | 0.3                            | 3.29046746 | 199.846312                         | 475.97      | 76.49  |
| 2                                              | 750   | 12       | 1.167            | 1.361            | 0.272            | 2.426            | 400.266          | 18.3                 | 8.5                            | 2.11962627 | 28.717012                          | 76.62       | 1.71   |
| 3                                              | 810   | 12       | 8.146            | 0.950            | 1.618            | 3.833            | 2590.26          | 10.7                 | 13.4                           | 0.9360999  | 72.270577                          | 186.94      | 4.28   |
| 4                                              | 860   | 12       | 1.858            | 0.754            | 0.368            | 2.841            | 836.066          | 38.0                 | 10.0                           | 1.00241183 | 109.783520                         | 276.83      | 2.03   |
| 5                                              | 910   | 12       | 0.284            | 1.139            | 0.118            | 3.425            | 541.73           | 89.3                 | 12.0                           | 1.25615248 | 136.359062                         | 337.91      | 1.52   |
| 6                                              | 960   | 12       | 0.336            | 3.017            | 0.119            | 3.520            | 617.767          | 88.2                 | 12.4                           | 3.23944637 | 150.548182                         | 369.70      | 1.69   |
| 7                                              | 1010  | 12       | 0.400            | 8.050            | 0.256            | 5.937            | 843.91           | 89.4                 | 20.8                           | 5.12759068 | 124.761893                         | 311.51      | 1.14   |
| 8                                              | 1060  | 12       | 0.248            | 6.288            | 0.123            | 3.689            | 533.269          | 91.3                 | 12.9                           | 6.44852923 | 127.512595                         | 317.81      | 1.56   |
| 9                                              | 1120  | 12       | 0.199            | 6.095            | 0.131            | 1.914            | 292.433          | 88.3                 | 6.7                            | 12.0675928 | 121.608253                         | 304.27      | 1.72   |
| 10                                             | 1190  | 12       | 0.152            | 2.269            | 0.029            | 0.465            | 113.326          | 77.9                 | 1.6                            | 18.5272295 | 139.225482                         | 344.38      | 9.22   |
| 11                                             | 1400  | 12       | 0.564            | 1.633            | 0.115            | 0.360            | 215.684          | 13.0                 | 1.3                            | 17.2163975 | 70.060261                          | 181.50      | 10.22  |
| Cumulative<br>% $^{39}\text{Ar}$<br>released = |       |          |                  |                  |                  |                  |                  |                      | 100.0                          |            | Total gas age =                    | 281.32      | 1.17   |

**Sample 2304, biotite, 1.40 mg, J = 0.0053346 ± 0.1091%**

32° 31.914' N, 55° 28.775' E

| Step                                           | T (C) | t (min.) | $^{36}\text{Ar}$ | $^{37}\text{Ar}$ | $^{38}\text{Ar}$ | $^{39}\text{Ar}$ | $^{40}\text{Ar}$ | % $^{40}\text{Ar}^*$ | % $^{39}\text{Ar}$<br>released | Ca/K       | $^{40}\text{Ar}^*/^{39}\text{ArK}$ | Age<br>(Ma) | 1 s.d. |
|------------------------------------------------|-------|----------|------------------|------------------|------------------|------------------|------------------|----------------------|--------------------------------|------------|------------------------------------|-------------|--------|
| 1                                              | 680   | 12       | 2.871            | 0.025            | 0.541            | 0.382            | 816.288          | -0.1                 | 0.2                            | 0.2535515  | -2.737221                          | -7.61       | -16.88 |
| 2                                              | 760   | 12       | 3.065            | 0.212            | 0.655            | 7.524            | 1167.750         | 25.9                 | 4.1                            | 0.10915855 | 39.781554                          | 107.12      | 1.06   |
| 3                                              | 810   | 12       | 9.132            | 0.373            | 2.014            | 22.983           | 3845.67          | 32.7                 | 12.4                           | 0.06287337 | 54.849739                          | 146.09      | 1.08   |
| 4                                              | 855   | 12       | 3.572            | 0.314            | 1.071            | 29.818           | 2716.07          | 63.2                 | 16.1                           | 0.04079556 | 57.564565                          | 153.02      | 0.65   |
| 5                                              | 900   | 12       | 0.632            | 0.223            | 0.564            | 33.838           | 2156.4           | 92.8                 | 18.3                           | 0.02553054 | 58.971072                          | 156.61      | 0.50   |
| 6                                              | 945   | 12       | 1.104            | 0.626            | 1.057            | 62.222           | 3799.98          | 92.4                 | 33.7                           | 0.03897552 | 56.539535                          | 150.41      | 0.48   |
| 7                                              | 990   | 12       | 0.339            | 0.362            | 0.265            | 15.118           | 968.434          | 92.5                 | 8.2                            | 0.09276471 | 58.218381                          | 154.69      | 0.54   |
| 8                                              | 1035  | 12       | 0.195            | 0.298            | 0.109            | 5.923            | 404.808          | 92.1                 | 3.2                            | 0.19492001 | 59.550334                          | 158.08      | 0.65   |
| 9                                              | 1085  | 12       | 0.117            | 0.775            | 0.066            | 3.081            | 217.681          | 96.0                 | 1.7                            | 0.97475115 | 60.499413                          | 160.49      | 1.12   |
| 10                                             | 1150  | 12       | 0.107            | 0.689            | 0.043            | 1.641            | 128.919          | 95.0                 | 0.9                            | 1.62734494 | 55.533265                          | 147.84      | 0.99   |
| 11                                             | 1400  | 12       | 0.376            | 1.726            | 0.092            | 2.271            | 242.653          | 57.0                 | 1.2                            | 2.94689669 | 45.989171                          | 123.28      | 1.96   |
| Cumulative<br>% $^{39}\text{Ar}$<br>released = |       |          |                  |                  |                  |                  |                  |                      | 100.0                          |            | Total gas age =                    | 149.75      | 0.46   |

**TABLE S3, continued.**  $^{40}\text{Ar}/^{39}\text{Ar}$  data for eastern domain samples

**Sample 2404, biotite, 1.40 mg, J = 0.0015473 ± 0.1123%**

32° 32.028' N, 55° 24.747' E

| Step                                           | T (C) | t (min.) | $^{36}\text{Ar}$ | $^{37}\text{Ar}$ | $^{38}\text{Ar}$ | $^{39}\text{Ar}$ | $^{40}\text{Ar}$ | % $^{40}\text{Ar}^*$ | % $^{39}\text{Ar}$<br>released | Ca/K       | $^{40}\text{Ar}^*/^{39}\text{ArK}$              | Age<br>(Ma)      | 1 s.d.       |
|------------------------------------------------|-------|----------|------------------|------------------|------------------|------------------|------------------|----------------------|--------------------------------|------------|-------------------------------------------------|------------------|--------------|
| 1                                              | 690   | 12       | 3.406            | 0.024            | 0.639            | 0.635            | 991.380          | 2.2                  | 0.3                            | 0.32679748 | 35.408661                                       | 96.23            | 11.56        |
| 2                                              | 770   | 12       | 1.193            | 0.060            | 0.306            | 6.072            | 638.441          | 48.8                 | 2.6                            | 0.08543369 | 49.847487                                       | 134.04           | 0.92         |
| 3                                              | 810   | 12       | 6.691            | 0.108            | 1.513            | 18.082           | 2947.75          | 35.8                 | 7.8                            | 0.05163956 | 58.354398                                       | 155.95           | 1.07         |
| 4                                              | 850   | 12       | 2.619            | 0.144            | 0.983            | 33.458           | 2686.04          | 73.0                 | 14.4                           | 0.03721053 | 58.575993                                       | 156.52           | 0.60         |
| 5                                              | 890   | 12       | 0.164            | 0.041            | 0.332            | 23.681           | 1430.37          | 98.5                 | 10.2                           | 0.01496871 | 59.000941                                       | 157.61           | 0.52         |
| 6                                              | 930   | 12       | 0.393            | 0.089            | 0.928            | 64.871           | 3879.12          | 97.8                 | 28.0                           | 0.0118615  | 58.610905                                       | 156.61           | 0.48         |
| 7                                              | 970   | 12       | 0.241            | 0.024            | 0.317            | 22.562           | 1369.27          | 96.8                 | 9.7                            | 0.00919673 | 58.185798                                       | 155.52           | 0.55         |
| 8                                              | 1050  | 12       | 0.301            | 0.059            | 0.448            | 30.953           | 1918.05          | 96.8                 | 13.3                           | 0.01647972 | 59.750226                                       | 159.52           | 0.49         |
| 9                                              | 1140  | 12       | 0.141            | 0.051            | 0.375            | 26.447           | 1605.70          | 99.1                 | 11.4                           | 0.01667226 | 59.428109                                       | 158.70           | 0.48         |
| 10                                             | 1400  | 12       | 0.348            | 0.097            | 0.150            | 5.271            | 417.979          | 80.7                 | 2.3                            | 0.15911019 | 54.983769                                       | 147.30           | 0.69         |
| Cumulative<br>% $^{39}\text{Ar}$<br>released = |       |          |                  |                  |                  |                  |                  |                      | 100.0                          |            | Total gas age =<br>Plateau age<br>(steps 3-6) = | 156.20<br>156.86 | 0.40<br>0.58 |

**Sample 2504, biotite, 1.80 mg, J = 0.00152694 ± 0.0993%**

32° 30.865' N, 55° 21.087' E

| Step                                           | T (C) | t (min.) | $^{36}\text{Ar}$ | $^{37}\text{Ar}$ | $^{38}\text{Ar}$ | $^{39}\text{Ar}$ | $^{40}\text{Ar}$ | % $^{40}\text{Ar}^*$ | % $^{39}\text{Ar}$<br>released | Ca/K       | $^{40}\text{Ar}^*/^{39}\text{ArK}$                     | Age<br>(Ma)      | 1 s.d.       |
|------------------------------------------------|-------|----------|------------------|------------------|------------------|------------------|------------------|----------------------|--------------------------------|------------|--------------------------------------------------------|------------------|--------------|
| 1                                              | 770   | 12       | 3.697            | 1.031            | 0.730            | 3.543            | 1178.11          | 10.6                 | 4.8                            | 1.21176812 | 37.252676                                              | 99.81            | 2.18         |
| 2                                              | 810   | 12       | 10.177           | 1.758            | 1.973            | 5.023            | 3212.25          | 9.8                  | 6.8                            | 1.45753771 | 63.094333                                              | 165.94           | 4.32         |
| 3                                              | 850   | 12       | 3.093            | 0.796            | 0.699            | 6.586            | 1255.83          | 30.1                 | 8.9                            | 0.50318861 | 57.018796                                              | 150.61           | 1.32         |
| 4                                              | 890   | 12       | 0.265            | 0.551            | 0.132            | 6.623            | 475.911          | 86.7                 | 9.0                            | 0.3463505  | 60.406719                                              | 159.17           | 0.52         |
| 5                                              | 930   | 12       | 0.341            | 1.193            | 0.237            | 11.971           | 818.517          | 90.7                 | 16.2                           | 0.41489475 | 60.692591                                              | 159.89           | 0.63         |
| 6                                              | 970   | 12       | 0.415            | 6.291            | 0.259            | 14.750           | 1004.91          | 90.4                 | 20.0                           | 1.7763699  | 60.653963                                              | 159.79           | 0.58         |
| 7                                              | 1050  | 12       | 0.565            | 30.581           | 0.310            | 15.826           | 1211.34          | 88.8                 | 21.5                           | 8.06318088 | 67.369872                                              | 176.65           | 0.63         |
| 8                                              | 1140  | 12       | 0.310            | 21.154           | 0.152            | 6.708            | 586.271          | 89.0                 | 9.1                            | 13.1792775 | 75.506441                                              | 196.86           | 0.72         |
| 9                                              | 1400  | 12       | 0.540            | 8.639            | 0.138            | 2.641            | 367.089          | 66.8                 | 3.6                            | 13.6726099 | 82.230342                                              | 213.39           | 1.84         |
| Cumulative<br>% $^{39}\text{Ar}$<br>released = |       |          |                  |                  |                  |                  |                  |                      | 100.0                          |            | Total gas age =<br>Pseudo plateau<br>age (steps 4-6) = | 165.38<br>159.57 | 0.53<br>0.65 |

**TABLE S4.** (U-Th)/He analytical data for western domain samples

| <b>Apatite (U-Th)/He data, western domain</b>                       |                      |                |                 |                    |                      |                 |                  |
|---------------------------------------------------------------------|----------------------|----------------|-----------------|--------------------|----------------------|-----------------|------------------|
| <b><u>Sample</u></b>                                                | <b>No. of grains</b> | <b>U (ppm)</b> | <b>Th (ppm)</b> | <b>He (nmol/g)</b> | <b>F<sub>T</sub></b> | <b>Age (Ma)</b> |                  |
|                                                                     |                      |                |                 |                    |                      | <b>Raw</b>      | <b>Corrected</b> |
| <b><u>G30, Diorite, Daranjir Diorite</u></b>                        |                      |                |                 |                    |                      |                 |                  |
| <i>32° 23.613' N, 55° 0.583' E</i>                                  |                      |                |                 |                    |                      |                 |                  |
|                                                                     | 4                    | 33             | 112             | 3.8                | 0.754                | 11.8            | 15.6             |
|                                                                     | 1                    | 45             | 122             | 5.3                | 0.678                | 13.2            | 19.4             |
|                                                                     | 1                    | 43             | 142             | 3.5                | 0.738                | 8.2             | 11.1             |
| Mean                                                                |                      |                |                 |                    |                      |                 | 15.4             |
| 2σ                                                                  |                      |                |                 |                    |                      |                 | 8.4              |
| <b><u>G27, Granite, Khoshoumi Granite</u></b>                       |                      |                |                 |                    |                      |                 |                  |
| <i>32° 26.973' N, 55° 5.002' E</i>                                  |                      |                |                 |                    |                      |                 |                  |
|                                                                     | 1                    | 24             | 59              | 3.5                | 0.770                | 16.7            | 21.6             |
|                                                                     | 1                    | 26             | 59              | 4.1                | 0.780                | 18.7            | 23.9             |
| Mean                                                                |                      |                |                 |                    |                      |                 | 22.8             |
| 2σ                                                                  |                      |                |                 |                    |                      |                 | 3.3              |
| <b><u>0504, Non-mylonitic biotite gneiss, Chapedony complex</u></b> |                      |                |                 |                    |                      |                 |                  |
| <i>32° 50.702' N, 55° 13.578' E</i>                                 |                      |                |                 |                    |                      |                 |                  |
|                                                                     | 4                    | 31             | 39              | 3.6                | 0.770                | 16.4            | 21.3             |
|                                                                     | 2                    | 27             | 28              | 2.4                | 0.778                | 13.2            | 17.0             |
|                                                                     | 3                    | 29             | 30              | 3.4                | 0.761                | 17.2            | 22.6             |
| Mean                                                                |                      |                |                 |                    |                      |                 | 20.3             |
| 2σ                                                                  |                      |                |                 |                    |                      |                 | 5.8              |

**TABLE S4, continued.** (U-Th)/He analytical data for western domain samples

| <b>Zircon (U-Th)/He data, western domain</b>                        |                      |                |                 |                    |                      |                 |                  |
|---------------------------------------------------------------------|----------------------|----------------|-----------------|--------------------|----------------------|-----------------|------------------|
| <b><u>Sample</u></b>                                                | <b>No. of grains</b> | <b>U (ppm)</b> | <b>Th (ppm)</b> | <b>He (nmol/g)</b> | <b>F<sub>T</sub></b> | <b>Age (Ma)</b> |                  |
|                                                                     |                      |                |                 |                    |                      | <b>Raw</b>      | <b>Corrected</b> |
| <b><u>G30, Diorite, Daranjir Diorite</u></b>                        |                      |                |                 |                    |                      |                 |                  |
| <i>32° 23.613' N, 55° 0.583' E</i>                                  |                      |                |                 |                    |                      |                 |                  |
|                                                                     | 1                    | 872            | 1075            | 198                | 0.757                | 32.4            | 42.7             |
|                                                                     | 1                    | 504            | 667             | 104                | 0.774                | 28.8            | 37.2             |
|                                                                     | 1                    | 574            | 517             | 133                | 0.824                | 35.1            | 42.6             |
|                                                                     | 1                    | 240            | 322             | 56                 | 0.816                | 32.6            | 39.9             |
| Mean                                                                |                      |                |                 |                    |                      |                 | 40.6             |
| 2σ                                                                  |                      |                |                 |                    |                      |                 | 5.2              |
| <b><u>G27, Granite, Khoshoumi Granite</u></b>                       |                      |                |                 |                    |                      |                 |                  |
| <i>32° 26.973' N, 55° 5.002' E</i>                                  |                      |                |                 |                    |                      |                 |                  |
|                                                                     | 1                    | 862            | 237             | 169                | 0.768                | 33.8            | 43.9             |
|                                                                     | 1                    | 1128           | 251             | 187                | 0.783                | 29.0            | 36.9             |
|                                                                     | 1                    | 502            | 176             | 92                 | 0.777                | 31.1            | 40.0             |
|                                                                     | 1                    | 594            | 165             | 112                | 0.791                | 32.6            | 41.2             |
| Mean                                                                |                      |                |                 |                    |                      |                 | 40.5             |
| 2σ                                                                  |                      |                |                 |                    |                      |                 | 5.8              |
| <b><u>0504, Non-mylonitic biotite gneiss, Chapedony complex</u></b> |                      |                |                 |                    |                      |                 |                  |
| <i>32° 50.702' N, 55° 13.578' E</i>                                 |                      |                |                 |                    |                      |                 |                  |
|                                                                     | 1                    | 316            | 185             | 57                 | 0.759                | 29.2            | 38.5             |
|                                                                     | 1                    | 241            | 269             | 49                 | 0.785                | 29.2            | 37.2             |
|                                                                     | 1                    | 392            | 501             | 99                 | 0.810                | 35.6            | 43.9             |
|                                                                     | 1                    | 343            | 322             | 71                 | 0.784                | 31.1            | 39.7             |
|                                                                     | 5                    | 183            | 151             | 44                 | 0.787                | 37.1            | 47.0             |
|                                                                     | 1                    | 208            | 124             | 43                 | 0.781                | 33.5            | 42.9             |
|                                                                     | 1                    | 265            | 370             | 73                 | 0.808                | 38.2            | 47.3             |
|                                                                     | 1                    | 290            | 399             | 77                 | 0.777                | 36.9            | 47.5             |
|                                                                     | 1                    | 324            | 211             | 70                 | 0.794                | 34.2            | 43.0             |
| Mean                                                                |                      |                |                 |                    |                      |                 | 43.0             |
| 2σ                                                                  |                      |                |                 |                    |                      |                 | 7.8              |
| <b><u>G18, Gneiss, Chapedony complex</u></b>                        |                      |                |                 |                    |                      |                 |                  |
| <i>32° 50.039' N, 55° 18.538' E</i>                                 |                      |                |                 |                    |                      |                 |                  |
|                                                                     | 1                    | 962            | 472             | 249                | 0.848                | 42.5            | 50.1             |
|                                                                     | 1                    | 827            | 212             | 173                | 0.852                | 36.1            | 42.4             |
|                                                                     | 1                    | 597            | 167             | 178                | 0.865                | 51.3            | 59.3             |
|                                                                     | 1                    | 787            | 233             | 170                | 0.852                | 37.0            | 43.4             |
| Mean                                                                |                      |                |                 |                    |                      |                 | 48.8             |
| 2σ                                                                  |                      |                |                 |                    |                      |                 | 15.6             |



**TABLE S5.** (U-Th)/He analytical data for eastern domain samples

| Apatite (U-Th)/He data, eastern domain                       |               |         |          |             |                |          |           |
|--------------------------------------------------------------|---------------|---------|----------|-------------|----------------|----------|-----------|
| <b>Sample</b>                                                | No. of grains | U (ppm) | Th (ppm) | He (nmol/g) | F <sub>T</sub> | Age (Ma) |           |
|                                                              |               |         |          |             |                | Raw      | Corrected |
| <b><u>2404, Metapelitic schist, Boneh-Shurow complex</u></b> |               |         |          |             |                |          |           |
| <i>32° 32.028' N, 55° 24.747' E</i>                          |               |         |          |             |                |          |           |
|                                                              | 3             | 6       | 3        | 0.3         | 0.702          | 6.7      | 9.6       |
|                                                              | 4             | 7       | 5        | 0.5         | 0.661          | 12.2     | 18.4      |
|                                                              | 1             | 10      | 8        | 1.2         | 0.689          | 18.7     | 27.0      |
|                                                              | 1             | 5       | 3        | 0.4         | 0.739          | 11.7     | 15.8      |
|                                                              | 1             | 9       | 6        | 0.8         | 0.655          | 13.3     | 20.3      |
|                                                              | 1             | 6       | 5        | 0.3         | 0.735          | 8.9      | 12.1      |
|                                                              | 1             | 6       | 2        | 0.6         | 0.697          | 17.6     | 25.2      |
| Mean                                                         |               |         |          |             |                |          | 18.3      |
| 2σ                                                           |               |         |          |             |                |          | 12.9      |
| <b><u>2104, Graywacke, Tashk Formation</u></b>               |               |         |          |             |                |          |           |
| <i>32° 31.917' N, 55° 28.776' E</i>                          |               |         |          |             |                |          |           |
|                                                              | 4             | 31      | 33       | 2.4         | 0.731          | 11.4     | 15.6      |
|                                                              | 3             | 9       | 6        | 0.9         | 0.692          | 15.9     | 23.0      |
|                                                              | 4             | 11      | 11       | 1.0         | 0.705          | 13.8     | 19.5      |
|                                                              | 3             | 25      | 29       | 2.6         | 0.631          | 14.5     | 23.0      |
| Mean                                                         |               |         |          |             |                |          | 20.3      |
| 2σ                                                           |               |         |          |             |                |          | 7.0       |
| <b><u>1804, Graywacke, Tashk Formation</u></b>               |               |         |          |             |                |          |           |
| <i>32° 30.554' N, 55° 31.001' E</i>                          |               |         |          |             |                |          |           |
|                                                              | 2             | 11      | 7        | 1.4         | 0.726          | 21.0     | 29.0      |
|                                                              | 2             | 8       | 5        | 0.7         | 0.780          | 14.5     | 18.6      |
|                                                              | 1             | 18      | 9        | 1.3         | 0.788          | 12.1     | 15.4      |
|                                                              | 1             | 16      | 5        | 1.0         | 0.851          | 10.1     | 11.9      |
|                                                              | 1             | 16      | 13       | 0.9         | 0.756          | 8.9      | 11.8      |
| Mean                                                         |               |         |          |             |                |          | 17.3      |
| 2σ                                                           |               |         |          |             |                |          | 14.2      |

**TABLE S5, continued.** (U-Th)/He analytical data for eastern domain samples

Zircon (U-Th)/He data, eastern domain

| <b>Sample</b> | No. of grains | U (ppm) | Th (ppm) | He (nmol/g) | $F_T$ | Age (Ma) |           |
|---------------|---------------|---------|----------|-------------|-------|----------|-----------|
|               |               |         |          |             |       | Raw      | Corrected |

**2304, Schist, Boneh-Shurow complex***32° 31.914' N, 55° 28.775' E*

|   |     |     |     |       |       |       |
|---|-----|-----|-----|-------|-------|-------|
| 1 | 283 | 144 | 94  | 0.710 | 54.2  | 76.1  |
| 1 | 177 | 102 | 74  | 0.710 | 67.3  | 94.5  |
| 1 | 637 | 360 | 307 | 0.716 | 77.6  | 108.1 |
| 1 | 265 | 153 | 102 | 0.746 | 62.2  | 83.2  |
| 4 | 348 | 195 | 221 | 0.744 | 102.2 | 136.8 |

Mean 99.7

2 $\sigma$  48.0**G12, Quartz diorite, Boneh-Shurow complex***32° 35.714' N, 55° 26.642' E*

|   |     |     |     |       |       |       |
|---|-----|-----|-----|-------|-------|-------|
| 3 | 292 | 167 | 203 | 0.792 | 111.4 | 140.1 |
| 4 | 452 | 274 | 284 | 0.783 | 100.1 | 127.5 |

Mean 133.8

2 $\sigma$  17.9**2104, Graywacke, Tashk Formation***32° 31.917' N, 55° 28.776' E*

|   |     |     |     |       |       |       |
|---|-----|-----|-----|-------|-------|-------|
| 1 | 128 | 58  | 75  | 0.758 | 96.8  | 127.3 |
| 1 | 146 | 47  | 83  | 0.745 | 95.8  | 128.1 |
| 1 | 125 | 28  | 75  | 0.759 | 104.2 | 136.9 |
| 1 | 308 | 99  | 106 | 0.753 | 58.7  | 77.7  |
| 1 | 288 | 130 | 77  | 0.749 | 44.5  | 59.3  |
| 5 | 231 | 83  | 93  | 0.738 | 68.0  | 92.0  |
| 5 | 256 | 63  | 99  | 0.752 | 67.1  | 89.1  |

Mean 101.5

2 $\sigma$  59.0**2004, Leucogranite***32° 31.936' N, 55° 28.728' E*

|   |    |    |    |       |      |       |
|---|----|----|----|-------|------|-------|
| 5 | 86 | 85 | 48 | 0.754 | 82.6 | 109.2 |
| 5 | 96 | 99 | 58 | 0.774 | 88.3 | 113.9 |
| 5 | 67 | 73 | 35 | 0.790 | 75.9 | 95.9  |

Mean 106.3

2 $\sigma$  18.6

**TABLE S5, continued.** (U-Th)/He analytical data for eastern domain samples

Zircon (U-Th)/He data, eastern domain

| <b>Sample</b> | No. of grains | U (ppm) | Th (ppm) | He (nmol/g) | $F_T$ | Age (Ma) |           |
|---------------|---------------|---------|----------|-------------|-------|----------|-----------|
|               |               |         |          |             |       | Raw      | Corrected |

**1804, Graywacke, Tashk Formation***32° 30.554' N, 55° 31.001' E*

|            |     |     |     |       |       |       |
|------------|-----|-----|-----|-------|-------|-------|
| 1          | 85  | 30  | 59  | 0.754 | 117.5 | 155.2 |
| 1          | 171 | 91  | 102 | 0.796 | 96.9  | 121.5 |
| 1          | 322 | 95  | 177 | 0.815 | 93.6  | 114.5 |
| 1          | 279 | 146 | 154 | 0.776 | 89.4  | 114.8 |
| 1          | 139 | 107 | 73  | 0.759 | 81.4  | 107.0 |
| 5          | 212 | 95  | 110 | 0.751 | 85.7  | 113.7 |
| Mean       |     |     |     |       |       | 121.1 |
| 2 $\sigma$ |     |     |     |       |       | 34.7  |

**G40, Tuffaceous rock, Tashk Formation***32° 31.169' N, 55° 34.034' E*

|            |     |     |     |       |       |       |
|------------|-----|-----|-----|-------|-------|-------|
| 1          | 473 | 102 | 290 | 0.790 | 106.4 | 134.2 |
| 1          | 425 | 338 | 223 | 0.739 | 80.9  | 109.2 |
| Mean       |     |     |     |       |       | 121.7 |
| 2 $\sigma$ |     |     |     |       |       | 35.3  |

**G28, Rhyodacite, CVSU***32° 27.465' N, 55° 36.338' E*

|            |     |     |     |       |       |       |
|------------|-----|-----|-----|-------|-------|-------|
| 1          | 148 | 108 | 115 | 0.806 | 120.3 | 148.9 |
| 1          | 104 | 77  | 57  | 0.790 | 85.0  | 107.3 |
| 1          | 105 | 67  | 77  | 0.831 | 116.3 | 139.7 |
| 1          | 166 | 116 | 89  | 0.799 | 84.6  | 105.6 |
| Mean       |     |     |     |       |       | 125.4 |
| 2 $\sigma$ |     |     |     |       |       | 44.3  |

## APPENDIX A. ANALYTICAL METHODS FOR U-Pb GEOCHRONOLOGY

Zircon was separated from bulk rock samples by standard crushing, heavy liquid, and magnetic separation techniques, and was subsequently handpicked using a binocular microscope, with selection based on clarity and crystal morphology. All grains were pre-treated to minimize the effects of Pb loss, by the method of thermal annealing and chemical leaching (chemical abrasion or CA-TIMS technique: Mattinson, 2005; Mundil et al., 2004) designed to preferentially remove the high-U parts of the zircon crystal that are most susceptible to Pb loss. Zircon grains are first annealed at 900°C for 60 hours and leached in 29M HF inside high-pressure Parr® vessels at 180°C for 12 hours. The partially dissolved sample is then fluxed successively with hot 4N HNO<sub>3</sub> and 6N HCl and thoroughly rinsed with ultra-pure water in between. Pre-treated and rinsed zircons were spiked with a mixed <sup>205</sup>Pb-<sup>233</sup>U-<sup>235</sup>U tracer solution and dissolved completely in 29M HF inside Parr® vessels at 220°C for 48-60 hours.

Dissolved Pb and U were chemically separated using a miniaturized HCl-based ion-exchange chromatography procedure modified after Krogh (1973), using 50 µl columns of AG1x8 anion-exchange resin. Both Pb and U were loaded with a silica gel - H<sub>3</sub>PO<sub>4</sub> emitter solution (Gerstenberger and Haase, 1997) on single degassed Re filaments and their isotopic compositions were measured on the VG Sector 54 multi-collector thermal ionization mass spectrometer at MIT. Lead isotopic measurements were made in a peak-switching mode by ion counting using a Daly photomultiplier detector with a <sup>206</sup>Pb ion beam intensity of 0.5 to 2.0 x 10<sup>-13</sup> Amps usually maintained in the course of data

acquisition. Uranium isotopes were measured as oxide ions on three Faraday detectors in a static mode with an average  $^{235}\text{U}^{16}\text{O}_2^+$  ion-beam intensity of  $8.0 \times 10^{-13}$  Amps.

Measured isotopic ratios were corrected for mass-dependent isotope fractionation in the mass spectrometer, as well as for U and Pb contributions from the spike, laboratory blanks and initial Pb in the sample. Details of fractionation and blank corrections are given in Table S1. The U-Pb data reduction, age calculation and error propagation follow the algorithm of Ludwig (1980) and the program ISOPLOT (Ludwig, 1991; version 3.14, 2004). All U-Pb dates are reported at 95% confidence levels.

- Gerstenberger, H., and Haase, G., 1997, A highly effective emitter substance for mass spectrometric Pb isotope ratio determinations: *Chemical Geology*, v. 136, no. 3-4, p. 309-312.
- Krogh, T.E., 1973, A low-contamination method for hydrothermal decomposition of zircon and extraction of U and Pb for isotopic age determinations: *Geochimica et Cosmochimica Acta*, v. 37, no. 3, p. 485-494.
- Ludwig, K.R., 1980, Calculation of uncertainties of U-Pb isotope data: *Earth and Planetary Science Letters*, v. 46, no. 2, p. 212-220.
- Ludwig, K.R., 1991, ISOPLOT; a plotting and regression program for radiogenic-isotope data; version 2.53: Open-File Report - U. S. Geological Survey, OF 91-0445.
- Mattinson, J.M., 2005, Zircon U-Pb chemical abrasion (CA-TIMS) method; combined annealing and multi-step partial dissolution analysis for improved precision and accuracy of zircon ages: *Chemical Geology*, v. 220, no. 1-2, p. 47-66.
- Mundil, R., Ludwig, K.R., Metcalfe, I., and Renne, P.R., 2004, Age and timing of the Permian mass extinctions; U-Pb dating of closed-system zircons: *Science*, v. 305, no. 5691, p. 1760-1763.

## APPENDIX B. ANALYTICAL METHODS FOR $^{40}\text{Ar}/^{39}\text{Ar}$ GEOCHRONOLOGY

### Berkeley Geochronology Center

Samples analyzed at the Berkeley Geochronology Center were irradiated in the cadmium-lined in-core irradiation tube (CLICIT) facility at the Oregon State University TRIGA research reactor. Samples were irradiated in wells in an Al disk of the type depicted by Renne et al. (1998) along with crystals of Fish Canyon sanidine. J-values were determined as the weighted mean of values (N=8) determined for each of three wells bracketing the samples, and the arithmetic mean and standard deviation ( $0.0026345 \pm 0.0000024$ ) of values for these three positions was used for age calculations. Ages are based on the constants of Steiger and Jäger (1977). Age uncertainties do not include contributions from decay constants or age of the standard.

Samples were degassed with a  $\text{CO}_2$  laser either by step-wise power increase or by total fusion. Stepwise heating utilized an integrator lens to enhance uniformity of laser power distribution. Analysis with an MAP 215C mass spectrometer followed methods described by Renne et al. (1998). Procedural blanks were measured between every three unknowns and were similar to values reported by Knight et al. (2004). Blank correction was based on regression of data spanning the runs. Mass discrimination ( $1.00755 \pm 0.00185$  per amu) was determined from analyses of 12 aliquots from an automated on-line air pipette system, regularly interspersed with the unknowns and standards, and the discrimination correction was applied as a power law function (Renne, 2000). Interfering Ar isotopes from Ca, K and Cl were corrected for using production ratios summarized by Renne et al. (2005).

### References

- Knight K.B., Nomade, S., Renne, P.R., Marzoli, A., Bertrand, H., and Youbi, N., 2004, The Central Atlantic Magmatic Province at the Triassic-Jurassic boundary: Paleomagnetic and  $^{40}\text{Ar}/^{39}\text{Ar}$  evidence from Morocco for brief, episodic volcanism: *Earth and Planetary Science Letters* v. 228, p. 143-160.
- Renne, P.R., Knight, K.B., Nomade, S., Leung, K.-N., and Lou, T.-P., 2005, Application of deuteron-deuteron (D-D) fusion neutrons to  $^{40}\text{Ar}/^{39}\text{Ar}$  geochronology: *Applied Radiation and Isotopes*, v. 62, p. 25-32.
- Renne, P.R., 2000, K-Ar and  $^{40}\text{Ar}/^{39}\text{Ar}$  Dating, in *Quaternary Geochronology: Methods and Applications* (J.S. Noller, J.M. Sowers, and W.R. Lettis, Eds.): American Geophysical Union Reference Shelf Series, v. 4, p. 77-100.
- Renne, P.R., Swisher, C.C., Deino, A.L., Karner, D.B., Owens, T., and DePaolo, D.J., 1998, Intercalibration of Standards, Absolute Ages and Uncertainties in  $^{40}\text{Ar}/^{39}\text{Ar}$  Dating: *Chemical Geology (Isotope Geoscience Section)*, v. 145, p. 117-152.

Steiger, R. H., and Jäger, E., 1977, Subcommittee on geochronology: Convention on the use of decay constants in geo- and cosmochemistry: Earth and Planetary Science Letters, v. 36, p. 359-362.

### University of Nevada, Las Vegas

Samples analyzed by the  $^{40}\text{Ar}/^{39}\text{Ar}$  method at the University of Nevada Las Vegas were wrapped in Al foil and stacked in 6 mm inside diameter Pyrex tubes. Individual packets averaged 3 mm thick and neutron fluence monitors (FC-2, Fish Canyon Tuff sanidine) were placed every 5-10 mm along the tube. Synthetic K-glass and optical grade  $\text{CaF}_2$  were included in the irradiation packages to monitor neutron induced argon interferences from K and Ca. Loaded tubes were packed in an Al container for irradiation. Samples irradiated at the Nuclear Science Center at Texas A&M University were in-core for 14 hours in the D3 position on the core edge (fuel rods on three sides, moderator on the fourth side) of the 1MW TRIGA type reactor. Irradiations are performed in a dry tube device, shielded against thermal neutrons by a 5 mm thick jacket of  $\text{B}_4\text{C}$  powder, which rotates about its axis at a rate of 0.7 revolutions per minute to mitigate horizontal flux gradients. Correction factors for interfering neutron reactions on K and Ca were determined by repeated analysis of K-glass and  $\text{CaF}_2$  fragments. Measured  $(^{40}\text{Ar}/^{39}\text{Ar})_{\text{K}}$  values were  $0.0002 (\pm 150\%)$ . Ca correction factors were  $(^{36}\text{Ar}/^{37}\text{Ar})_{\text{Ca}} = 3.134 (\pm 7.09\%) \times 10^{-4}$  and  $(^{39}\text{Ar}/^{37}\text{Ar})_{\text{Ca}} = 7.357 (\pm 9.92\%) \times 10^{-4}$ . J factors were determined by fusion of 4-5 individual crystals of neutron fluence monitors which gave reproducibility's of 0.15% to 0.44% at each standard position. Variation in neutron flux along the 100 mm length of the irradiation tubes was <4%. An error in J of 0.1458% was used in age calculations. No significant neutron flux gradients were present within individual packets of crystals as indicated by the excellent reproducibility of the single crystal flux monitor fusions.

Irradiated crystals together with  $\text{CaF}_2$  and K-glass fragments were placed in a Cu sample tray in a high vacuum extraction line and were fused using a 20 W  $\text{CO}_2$  laser. Sample viewing during laser fusion was by a video camera system and positioning was via a motorized sample stage. Samples analyzed by the furnace step heating method utilized a double vacuum resistance furnace similar to the Staudacher et al. (1978) design. Reactive gases were removed by a single MAP and two GP-50 SAES getters prior to being admitted to a MAP 215-50 mass spectrometer by expansion. The relative volumes of the extraction line and mass spectrometer allow 80% of the gas to be admitted to the mass spectrometer for laser fusion analyses and 76% for furnace heating analyses. Peak intensities were measured using a Balzers electron multiplier by peak hopping through 7 cycles; initial peak heights were determined by linear regression to the time of gas admission. Mass spectrometer discrimination and sensitivity was monitored by repeated analysis of atmospheric argon aliquots from an on-line pipette system. Measured  $^{40}\text{Ar}/^{36}\text{Ar}$  ratios were  $284.31 \pm 0.23\%$  during this work, thus a discrimination correction of 1.03938 (4 AMU) was applied to measured isotope ratios. The sensitivity of the mass spectrometer was  $\sim 6 \times 10^{-17}$  mol  $\text{mV}^{-1}$  with the multiplier operated at a gain of 52 over the Faraday. Line blanks averaged 2.04 mV for mass 40 and 0.002 mV for mass 36 for laser fusion analyses and 33.36 mV for mass 40 and 0.08 mV for mass 36 for furnace

heating analyses. Discrimination, sensitivity, and blanks were relatively constant over the period of data collection. Computer automated operation of the sample stage, laser, extraction line and mass spectrometer as well as final data reduction and age calculations were done using LabSPEC software written by B. Idleman (Lehigh University). An age of 28.02 Ma was used for the Fish Canyon Tuff sanidine flux monitor in calculating ages for samples.

For  $^{40}\text{Ar}/^{39}\text{Ar}$  analyses a plateau segment consists of 3 or more contiguous gas fractions having analytically indistinguishable ages (i.e. all plateau steps overlap in age at  $\pm 2\sigma$  analytical error) and comprising a significant portion of the total gas released (typically  $>50\%$ ). Total gas (integrated) ages are calculated by weighting by the amount of  $^{39}\text{Ar}$  released, whereas plateau ages are weighted by the inverse of the variance. For each sample inverse isochron diagrams are examined to check for the effects of excess argon. Reliable isochrons are based on the MSWD criteria of Wendt and Carl (1991) and, as for plateaus, must comprise contiguous steps and a significant fraction of the total gas released. All analytical data are reported at the confidence level of  $1\sigma$  (standard deviation).

Staudacher, T.H., Jessberger, E.K., Dorflinger, D., and Kiko, J., A refined ultrahigh-vacuum furnace for rare gas analysis, *J. Phys. E: Sci. Instrum.*, 11, 781-784, 1978.  
Wendt, I., and Carl, C., 1991, The statistical distribution of the mean squared weighted deviation, *Chemical Geology*, v. 86, p. 275-285.



## APPENDIX C. ANALYTICAL METHODS FOR (U-Th)/He THERMOCHRONOLOGY

Apatites and zircon grains were separated from bulk rock samples by standard crushing, heavy liquid, and magnetic separation techniques and were subsequently handpicked using a binocular microscope. Apatite crystals were selected based on morphology, clarity, and lack of inclusions using a binocular microscope with crossed polars. Zircon selection was based on clarity and crystal morphology. Prior to analysis, grains were photographed and dimensions were measured. Grains were packaged in Pt packets and heated to 1065° C for eight minutes. Extracted He gas was spiked with  $^3\text{He}$ , purified using cryogenic and gettering methods, and analyzed on a quadrupole mass spectrometer.

Degassed apatites were retrieved, spiked with a  $^{235}\text{U}$ - $^{230}\text{Th}$ - $^{51}\text{V}$  tracer, dissolved in  $\text{HNO}_3$  at ~90 °C for 1 hour, and analyzed on a Finnigan Element ICP-MS. Degassed zircons were retrieved, placed in a larger Pt packet with a flux of Li metaborate, heated in a muffle furnace to 1000° C for two hours, and allowed to cool. The resultant bead was spiked with a  $^{235}\text{U}$ - $^{230}\text{Th}$ - $^{51}\text{V}$  tracer, dissolved in  $\text{HNO}_3$  and analyzed on a Finnigan Element ICP-MS. A hexagonal prism morphology was used to make an alpha-ejection corrections for each crystal to account for He ejected from crystal margins (Farley et al., 1996). Fragments of the Durango apatite standard were analyzed by the same procedures with the batch of unknowns.

Farley, K.A., Wolf, R.A., and Silver, L.T., 1996, The effects of long alpha-stopping distances on (U-Th)/He ages: *Geochimica et Cosmochimica Acta*, v. 60, p. 4223-4229.
